# Supplementary material
Source: PubMed Central journal article supplement (PMC6237623)
Supplement: NIHMS980164-supplement-Supplemental_Data_File__figure__table__etc___-_online_only.pdf [file NIHMS980164-supplement-Supplemental_Data_File__figure__table__etc___-_online_only.pdf]

**Table 1 Supplemental Digital Content. Summary of previously published single dose oral omeprazole studies in healthy subjects.**

| Study reference               | N  | Omeprazole oral dose (mg) | Assay used | Subject Demographics |                    |                        | PK sampling time points post-dose (h)                            | CYP2C19 Genotype Data |
|-------------------------------|----|---------------------------|------------|----------------------|--------------------|------------------------|------------------------------------------------------------------|-----------------------|
|                               |    |                           |            | Median Age (yr)      | Median Weight (kg) | Sex (M=male, F=female) |                                                                  |                       |
| Allegrini et al. <sup>9</sup> | 50 | 20 mg                     | HPLC + UV  | Unknown              | Unknown            | Unknown                | 0.5, 1, 1.5, 2.0, 2.5, 3.0, 3.5, 4.0, 4.5, 5.0, 6.0, 8.0, 10, 12 | No                    |
| Baldwin et al. <sup>10</sup>  | 18 | 40 mg                     | HPLC + UV  | 32                   | 70.8               | 33.3% M<br>66.7% F     | 0, 0.5, 1, 1.5, 2, 3, 4, 6, 8, 10                                | Yes                   |
| Cho et al. <sup>3</sup>       | 13 | 40 mg                     | HPLC + UV  | 20                   | 61                 | 76.9% M<br>23.1% F     | 0, 0.33, 0.66, 1, 1.5, 2, 3, 4, 5, 6, 8, 12, 24                  | Yes                   |

|                              |    |       |              |         |         |                    |                                                                           |     |
|------------------------------|----|-------|--------------|---------|---------|--------------------|---------------------------------------------------------------------------|-----|
| Hussein et al. <sup>11</sup> | 36 | 20 mg | HPLC + UV    | Unknown | Unknown | 100% M             | 0.25, 0.50, 0.75, 1.0, 1.25, 1.50, 1.75, 2.0, 2.25, 3, 4, 5, 6, 8, 10, 12 | No  |
| Johnson et al. <sup>12</sup> | 15 | 40 mg | HPLC + MS/MS | 41      | 81.9    | 46.7% M<br>53.3% F | 0, 0.5, 1, 1.5, 2, 2.5, 3, 4, 6, 8, 10                                    | Yes |
| Rhim et al. <sup>13</sup>    | 12 | 20 mg | HPLC + UV    | Unknown | Unknown | 100% M             | 0.5, 1, 1.5, 2, 2.5, 3, 3.5, 4, 5, 6, 8, 9                                | No  |
| Yin et al. <sup>8</sup>      | 26 | 40 mg | HPLC + UV    | 22      | 60.7    | 100% M             | 0, 0.33, 0.67, 1, 1.5, 2, 2.5, 3, 4, 6, 8, 10, 12                         | Yes |

**Abbreviations:** HPLC=high performance liquid chromatography; h=hour; kg=kilogram; MS=mass spectrometry;

PK=pharmacokinetic, UV=ultraviolet; yr-year.

**Table 2 Supplemental Digital Content. Pharmacokinetic parameter estimates by non-compartmental analysis and population pharmacokinetic final model**

| Parameter Estimates          | Non-compartmental analysis (n=170) | Population pharmacokinetic model (n=71) |                        |
|------------------------------|------------------------------------|-----------------------------------------|------------------------|
|                              |                                    | Final Model                             | Bootstrap              |
| CL/F (L/h)                   | 23.7 (4.0-131.4)                   | 19.3 (5.3-75.7)                         | 17.8 (13.7-24)         |
| V (L)                        | 35.6 (10.8-246.8)                  | 23.7 (16.7-31.4)                        | 26.7 (22.3-32.3)       |
| Half-life (h)                | 0.95 (0.4-3.1)                     | 0.9 (0.2-2.6)                           | 1.1 (0.8, 1.3)         |
| AUC <sub>inf</sub> (h*ng/mL) | 980.2 (165.5-9320.7)               | 2077.4 (544.4-7537.0)                   | 2247.2 (1666.7-2919.7) |
| T <sub>max</sub> (h)         | 1.8 (0.8-5.0)                      | 2.2 (0.8-10.7)                          | 1.8 (0.8, 2.3)         |

Data are median (2.5th and 97.5th percentiles) values. Population PK parameter estimates from the final model and bootstrap are median typical values.

**Abbreviations:** CL/F= apparent oral clearance; V=volume of distribution; AUC<sub>inf</sub>, area under the concentration time curve from time 0 to infinity; T<sub>max</sub>=time to maximum concentration.

**Figure 1. Individual plasma concentration time profiles from each previously published study.**

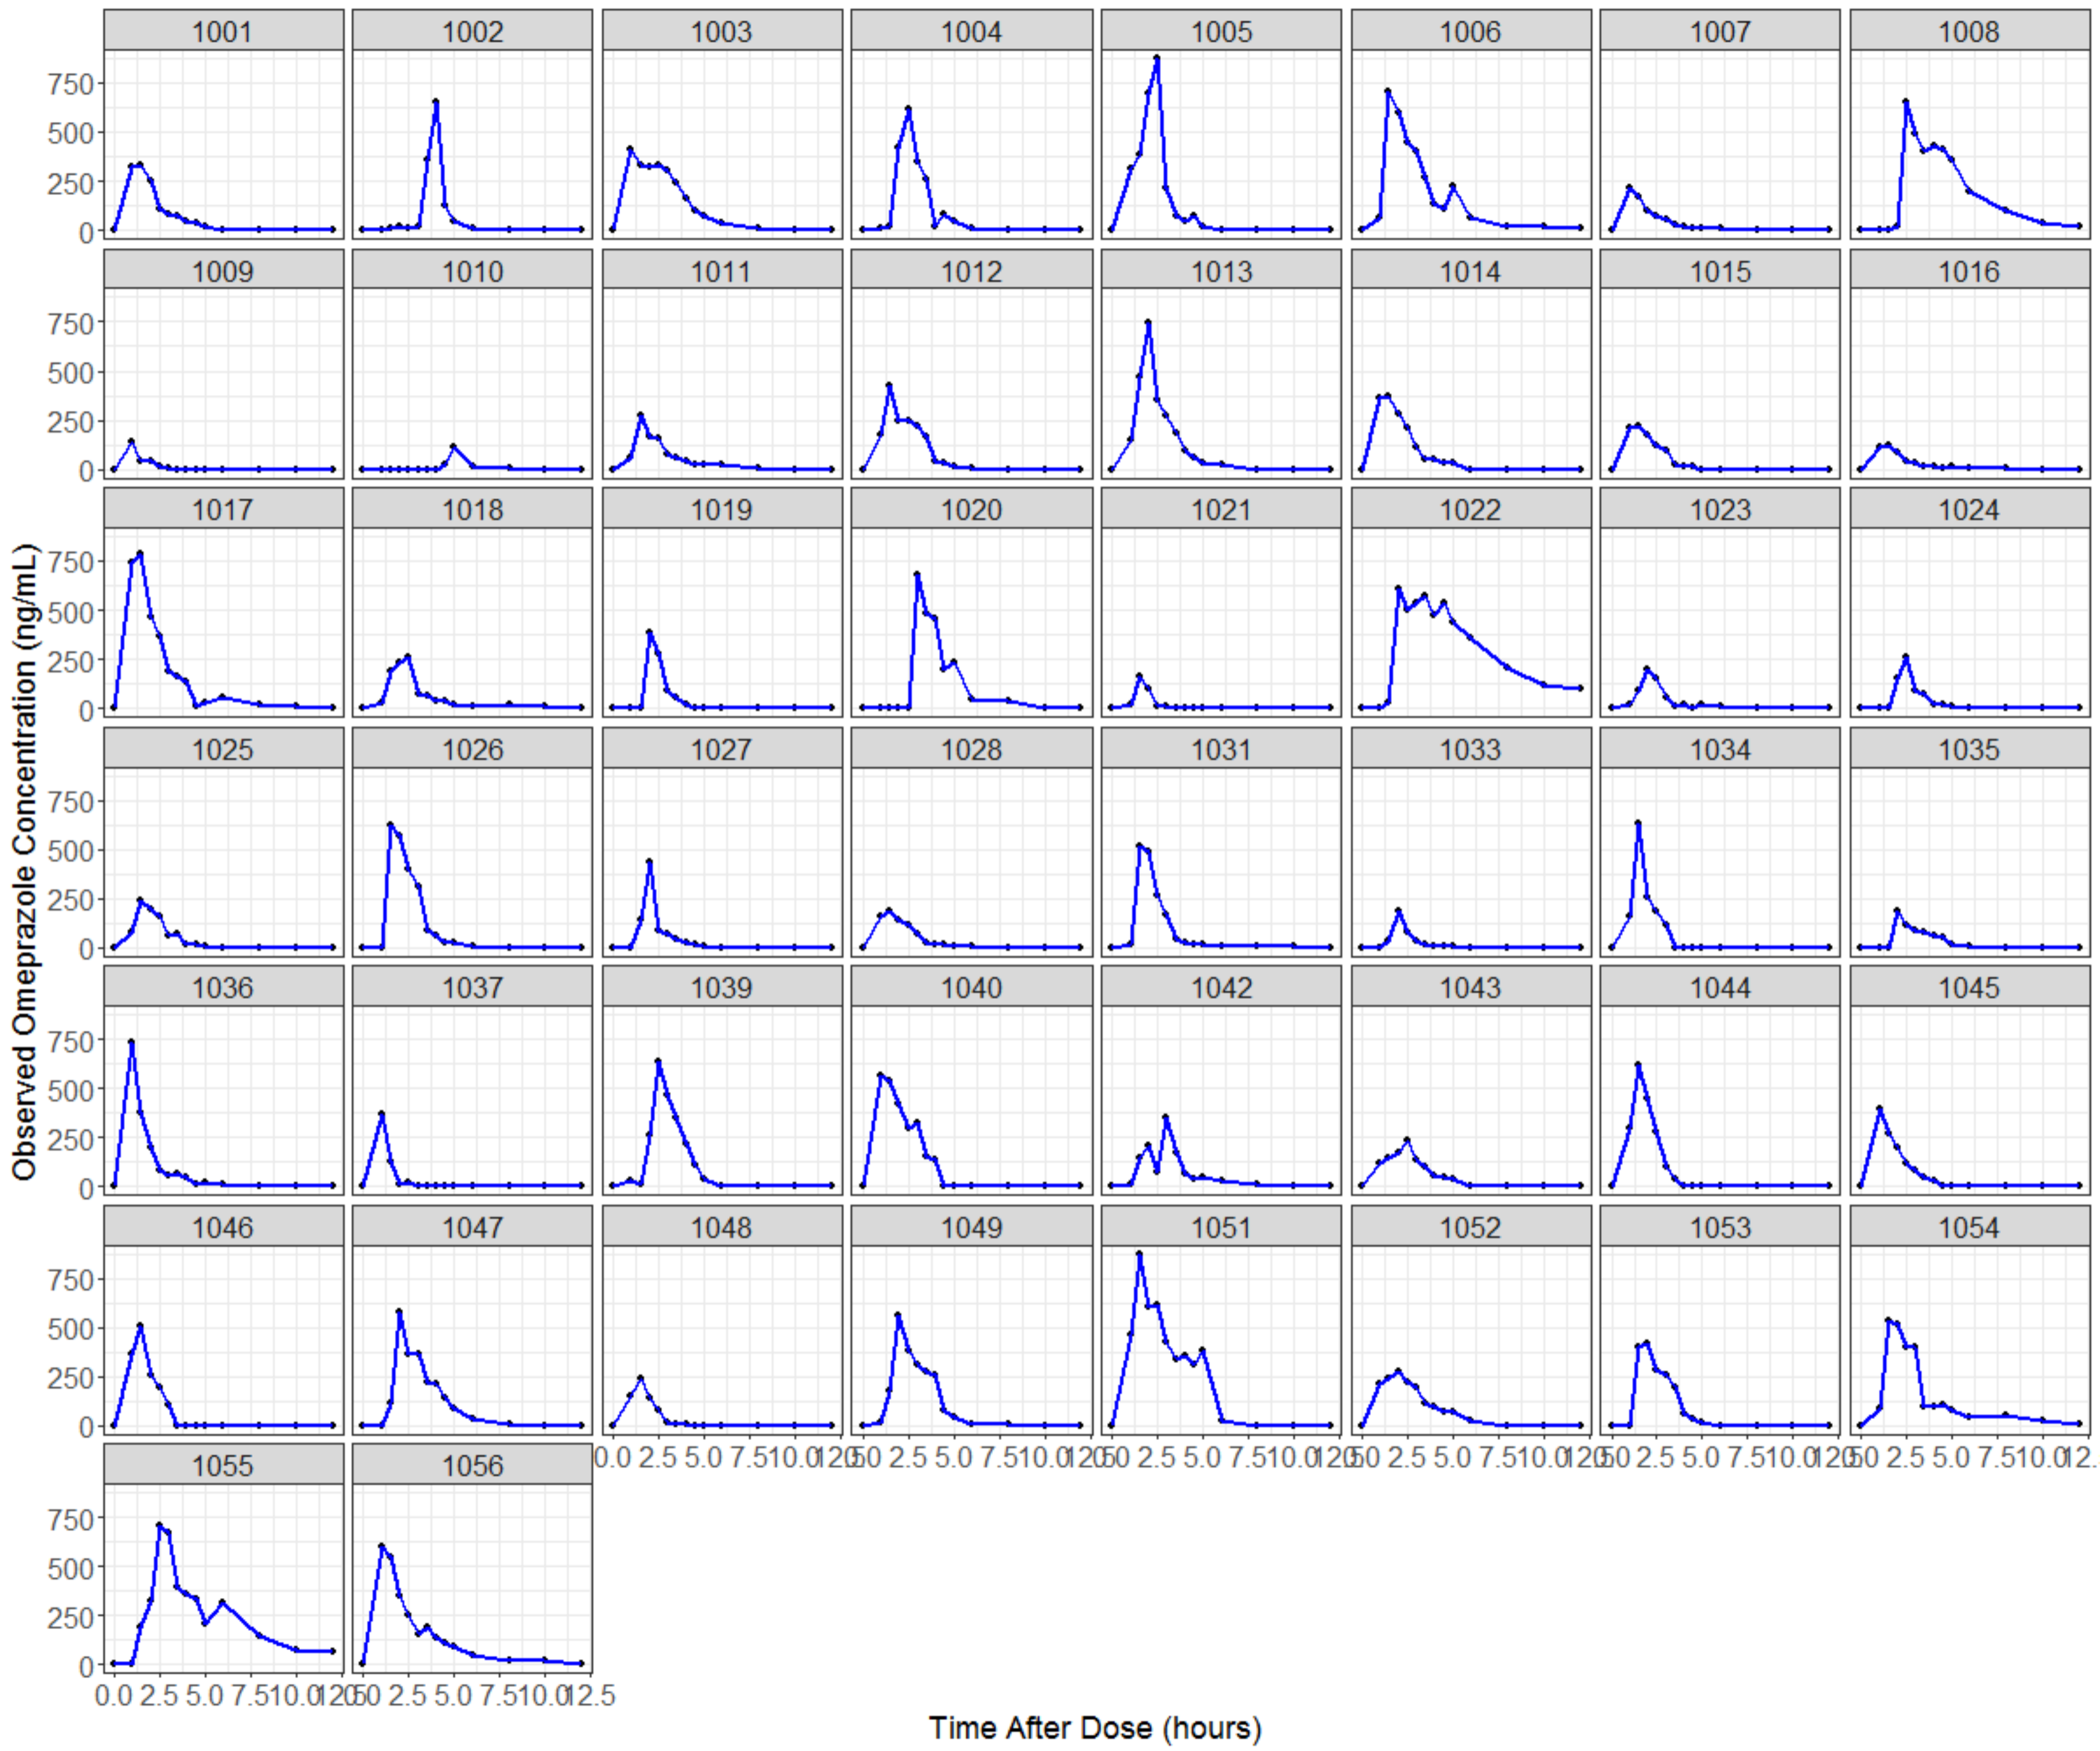

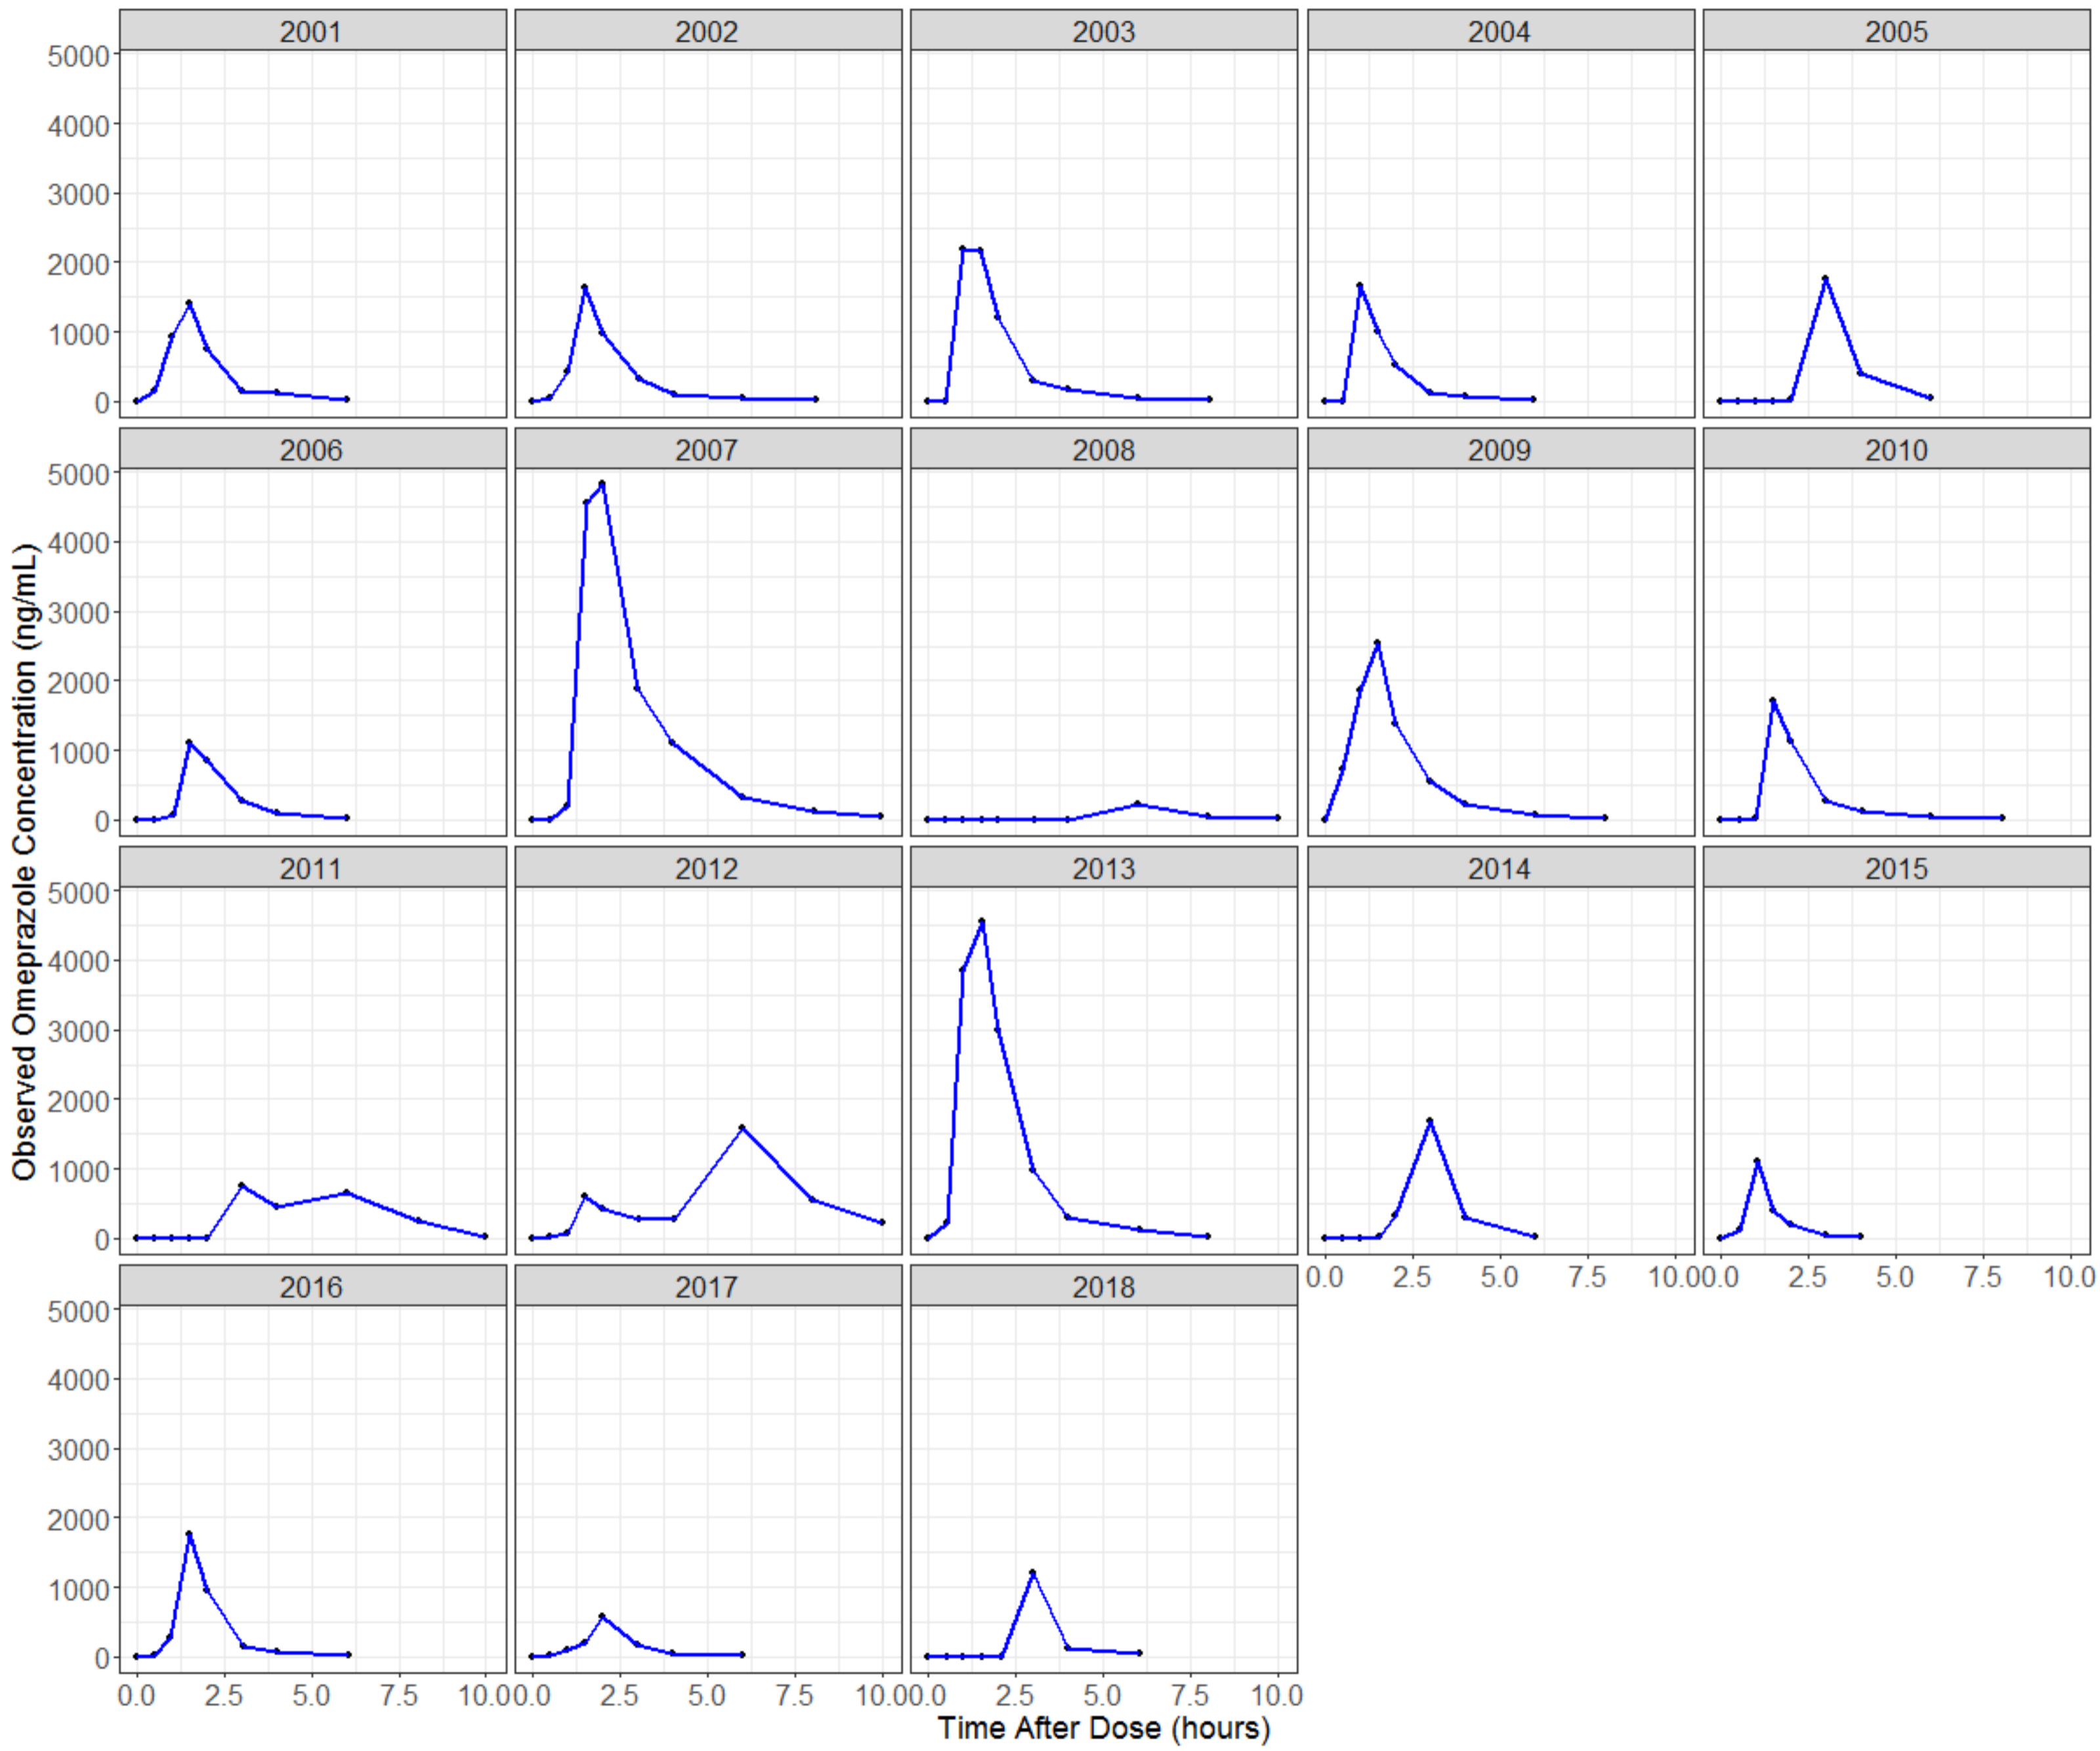

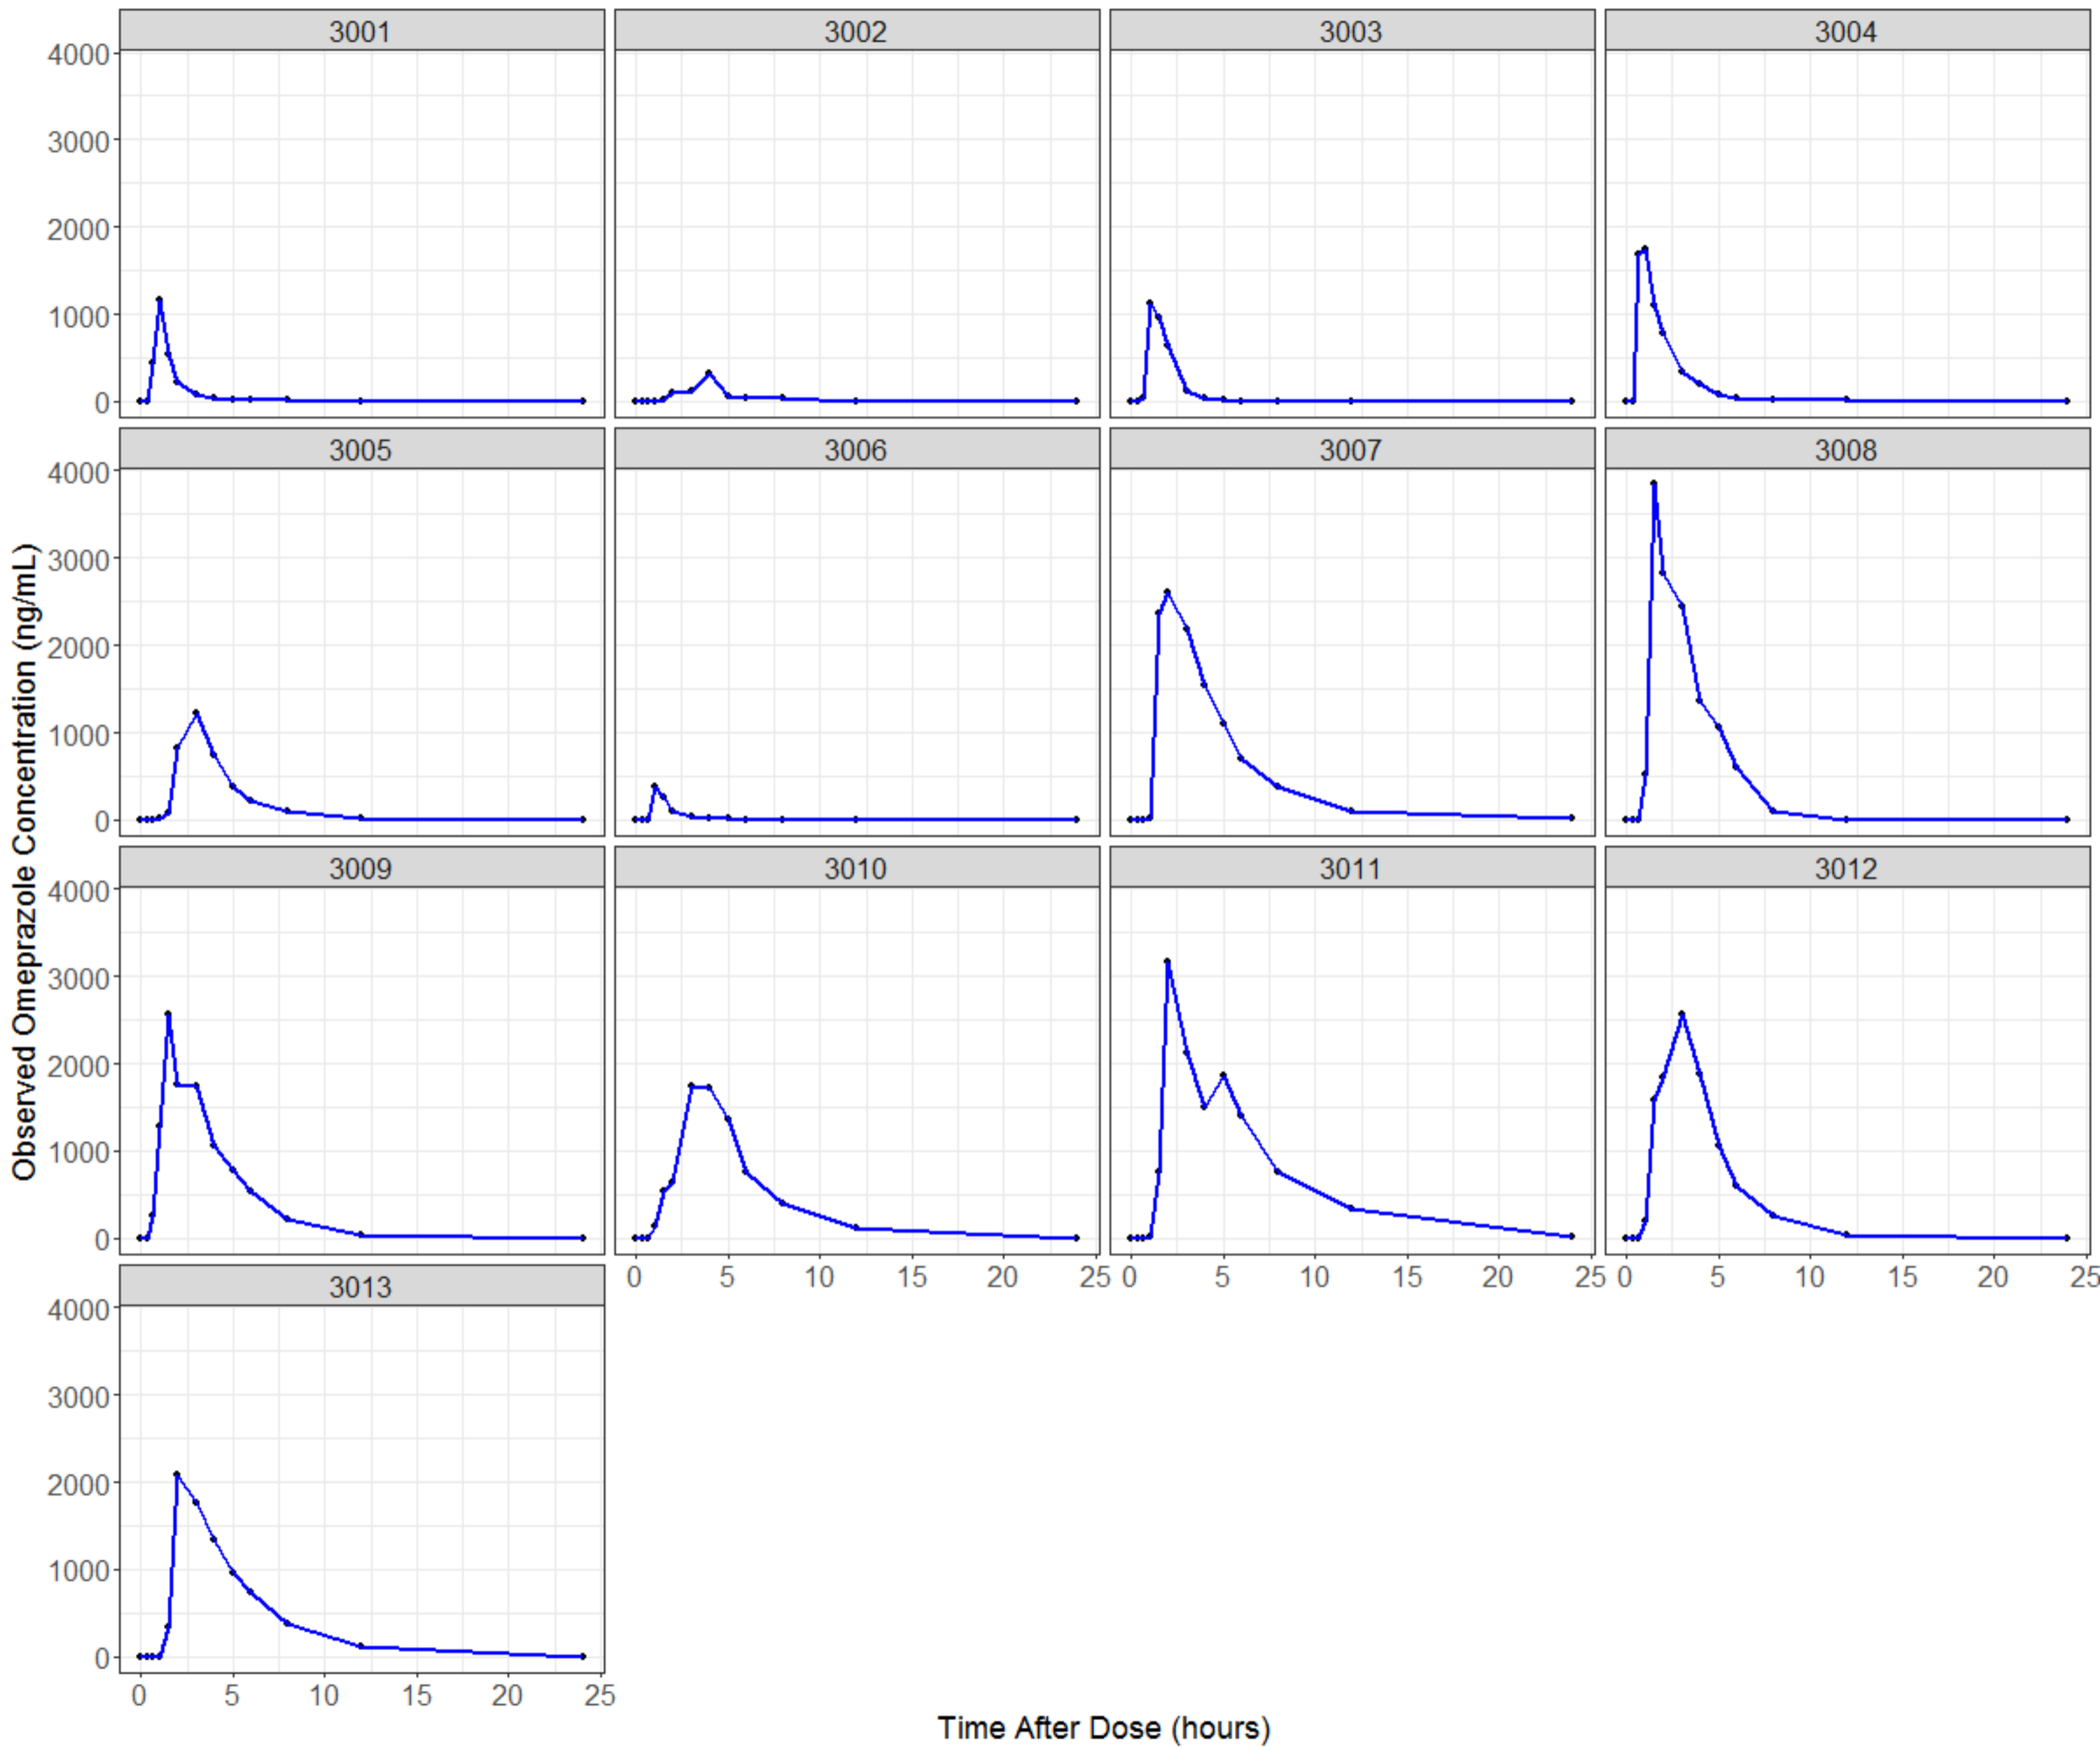

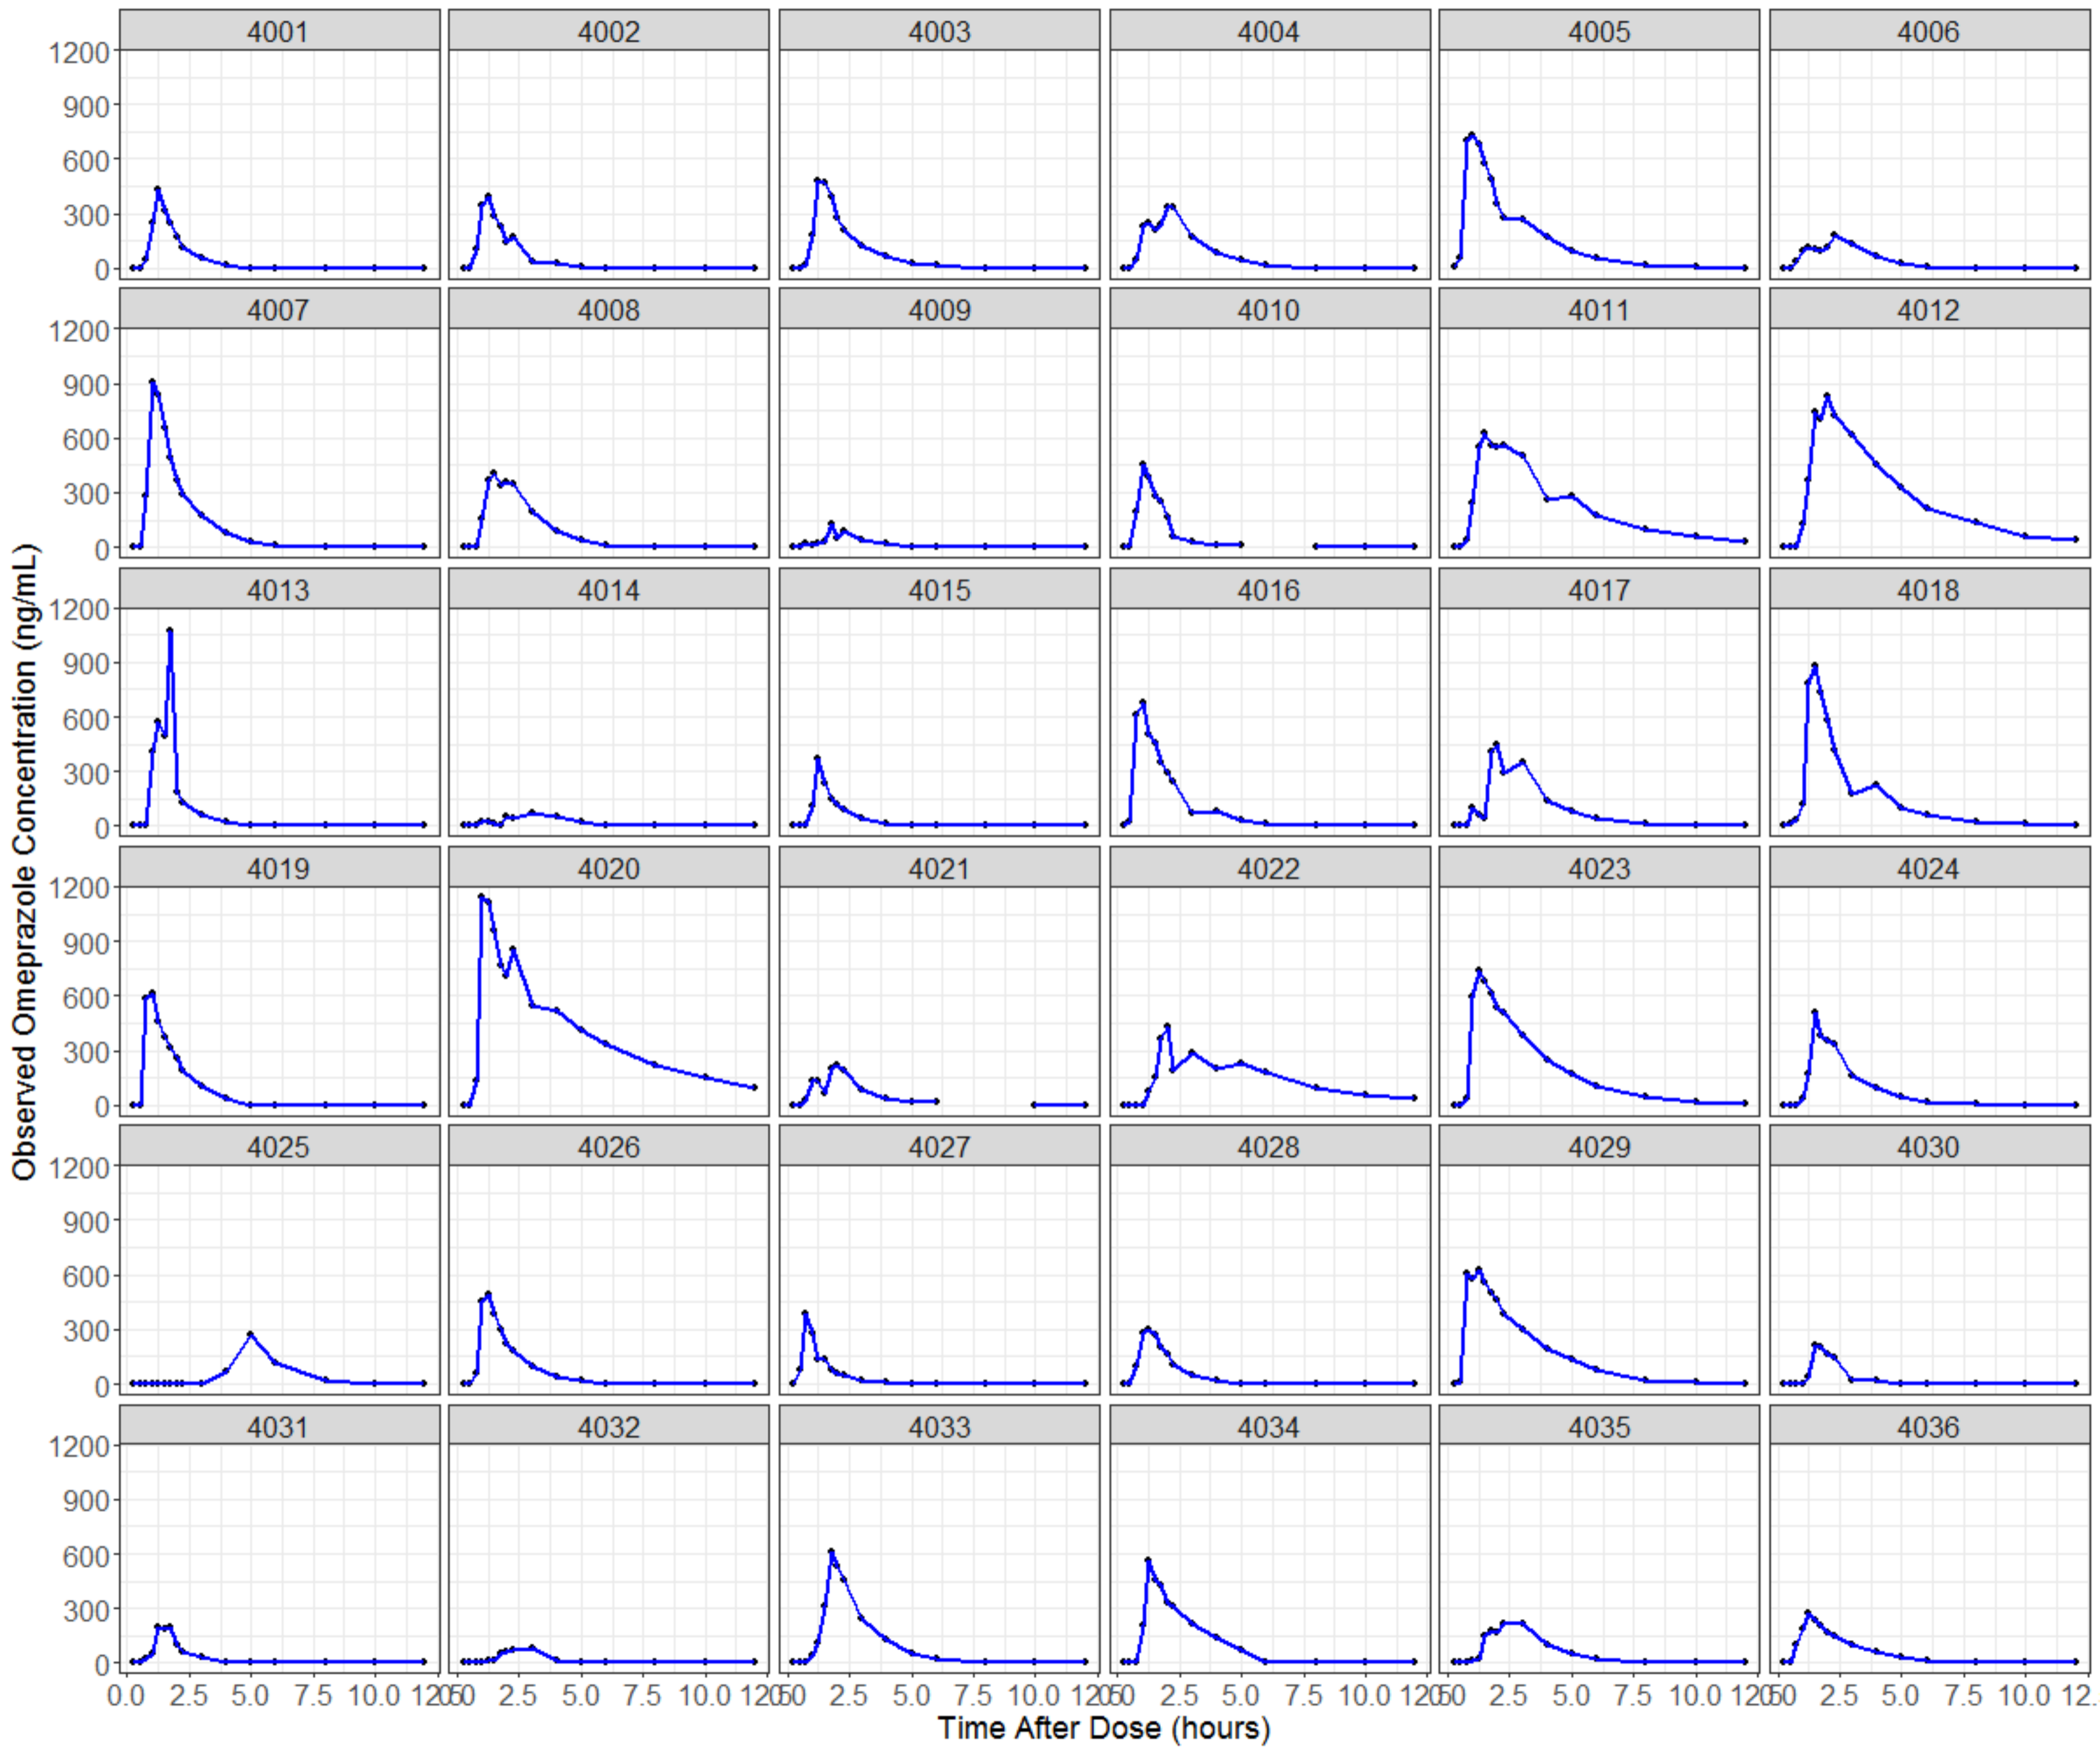



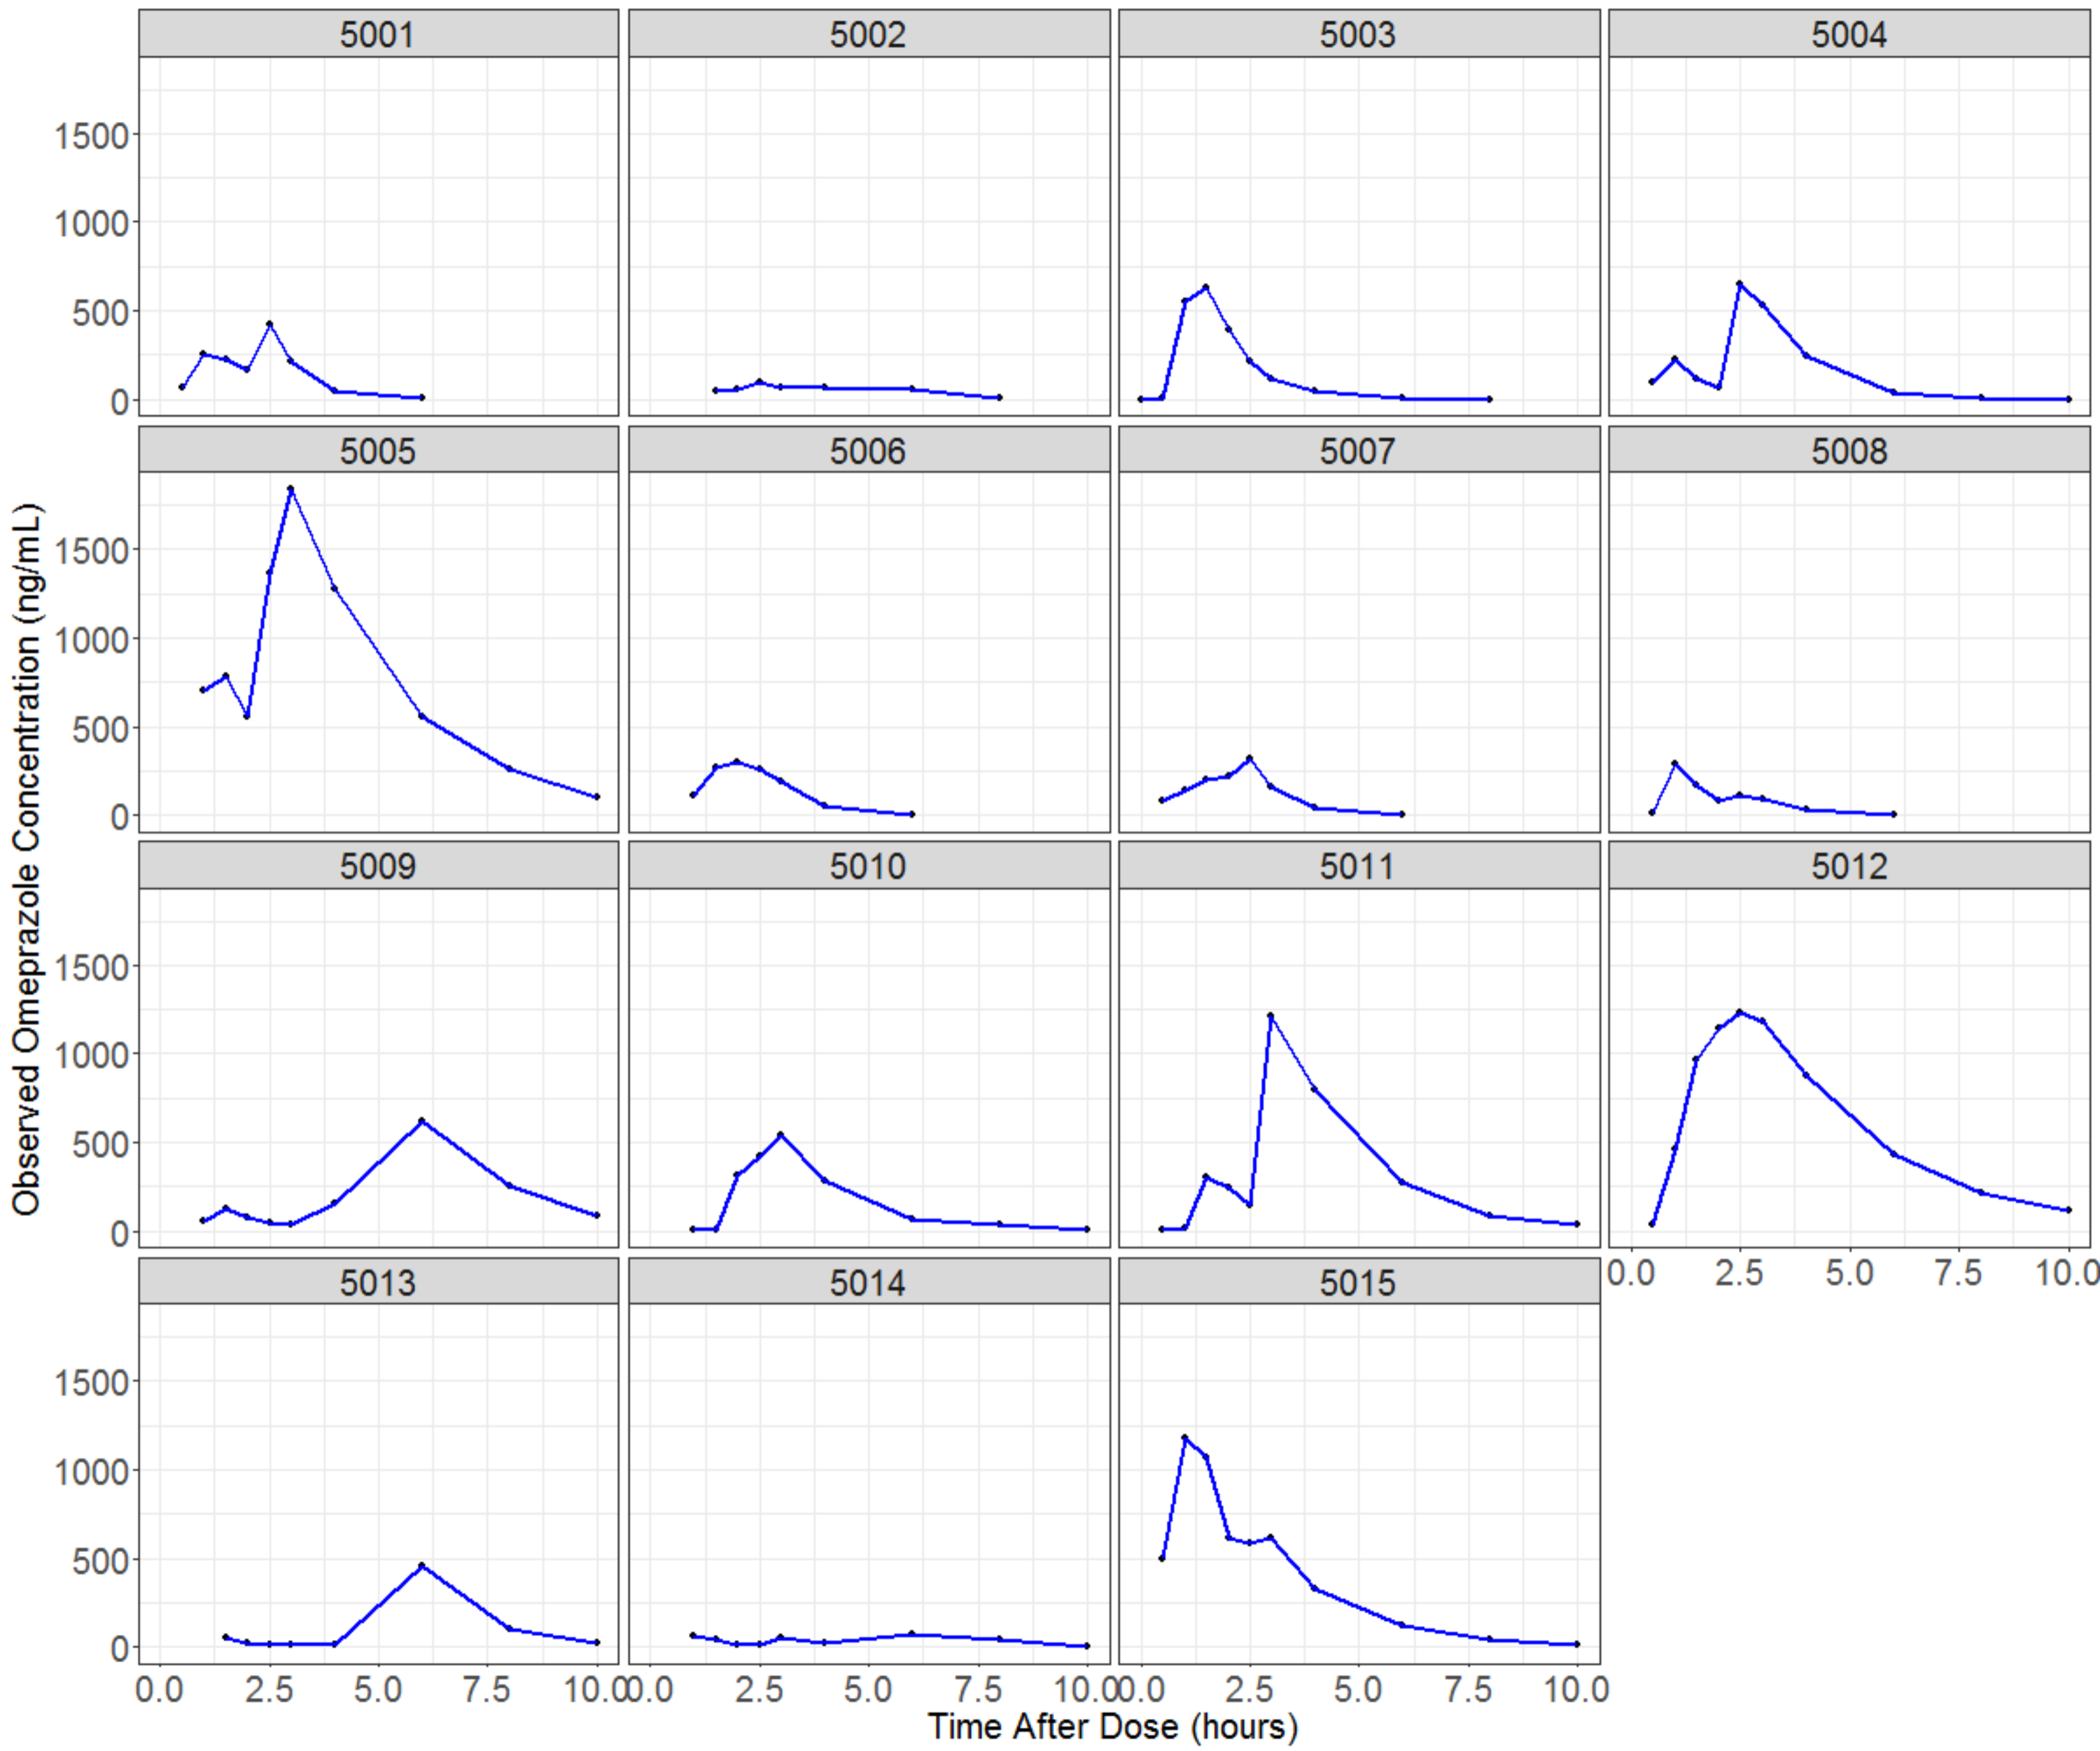

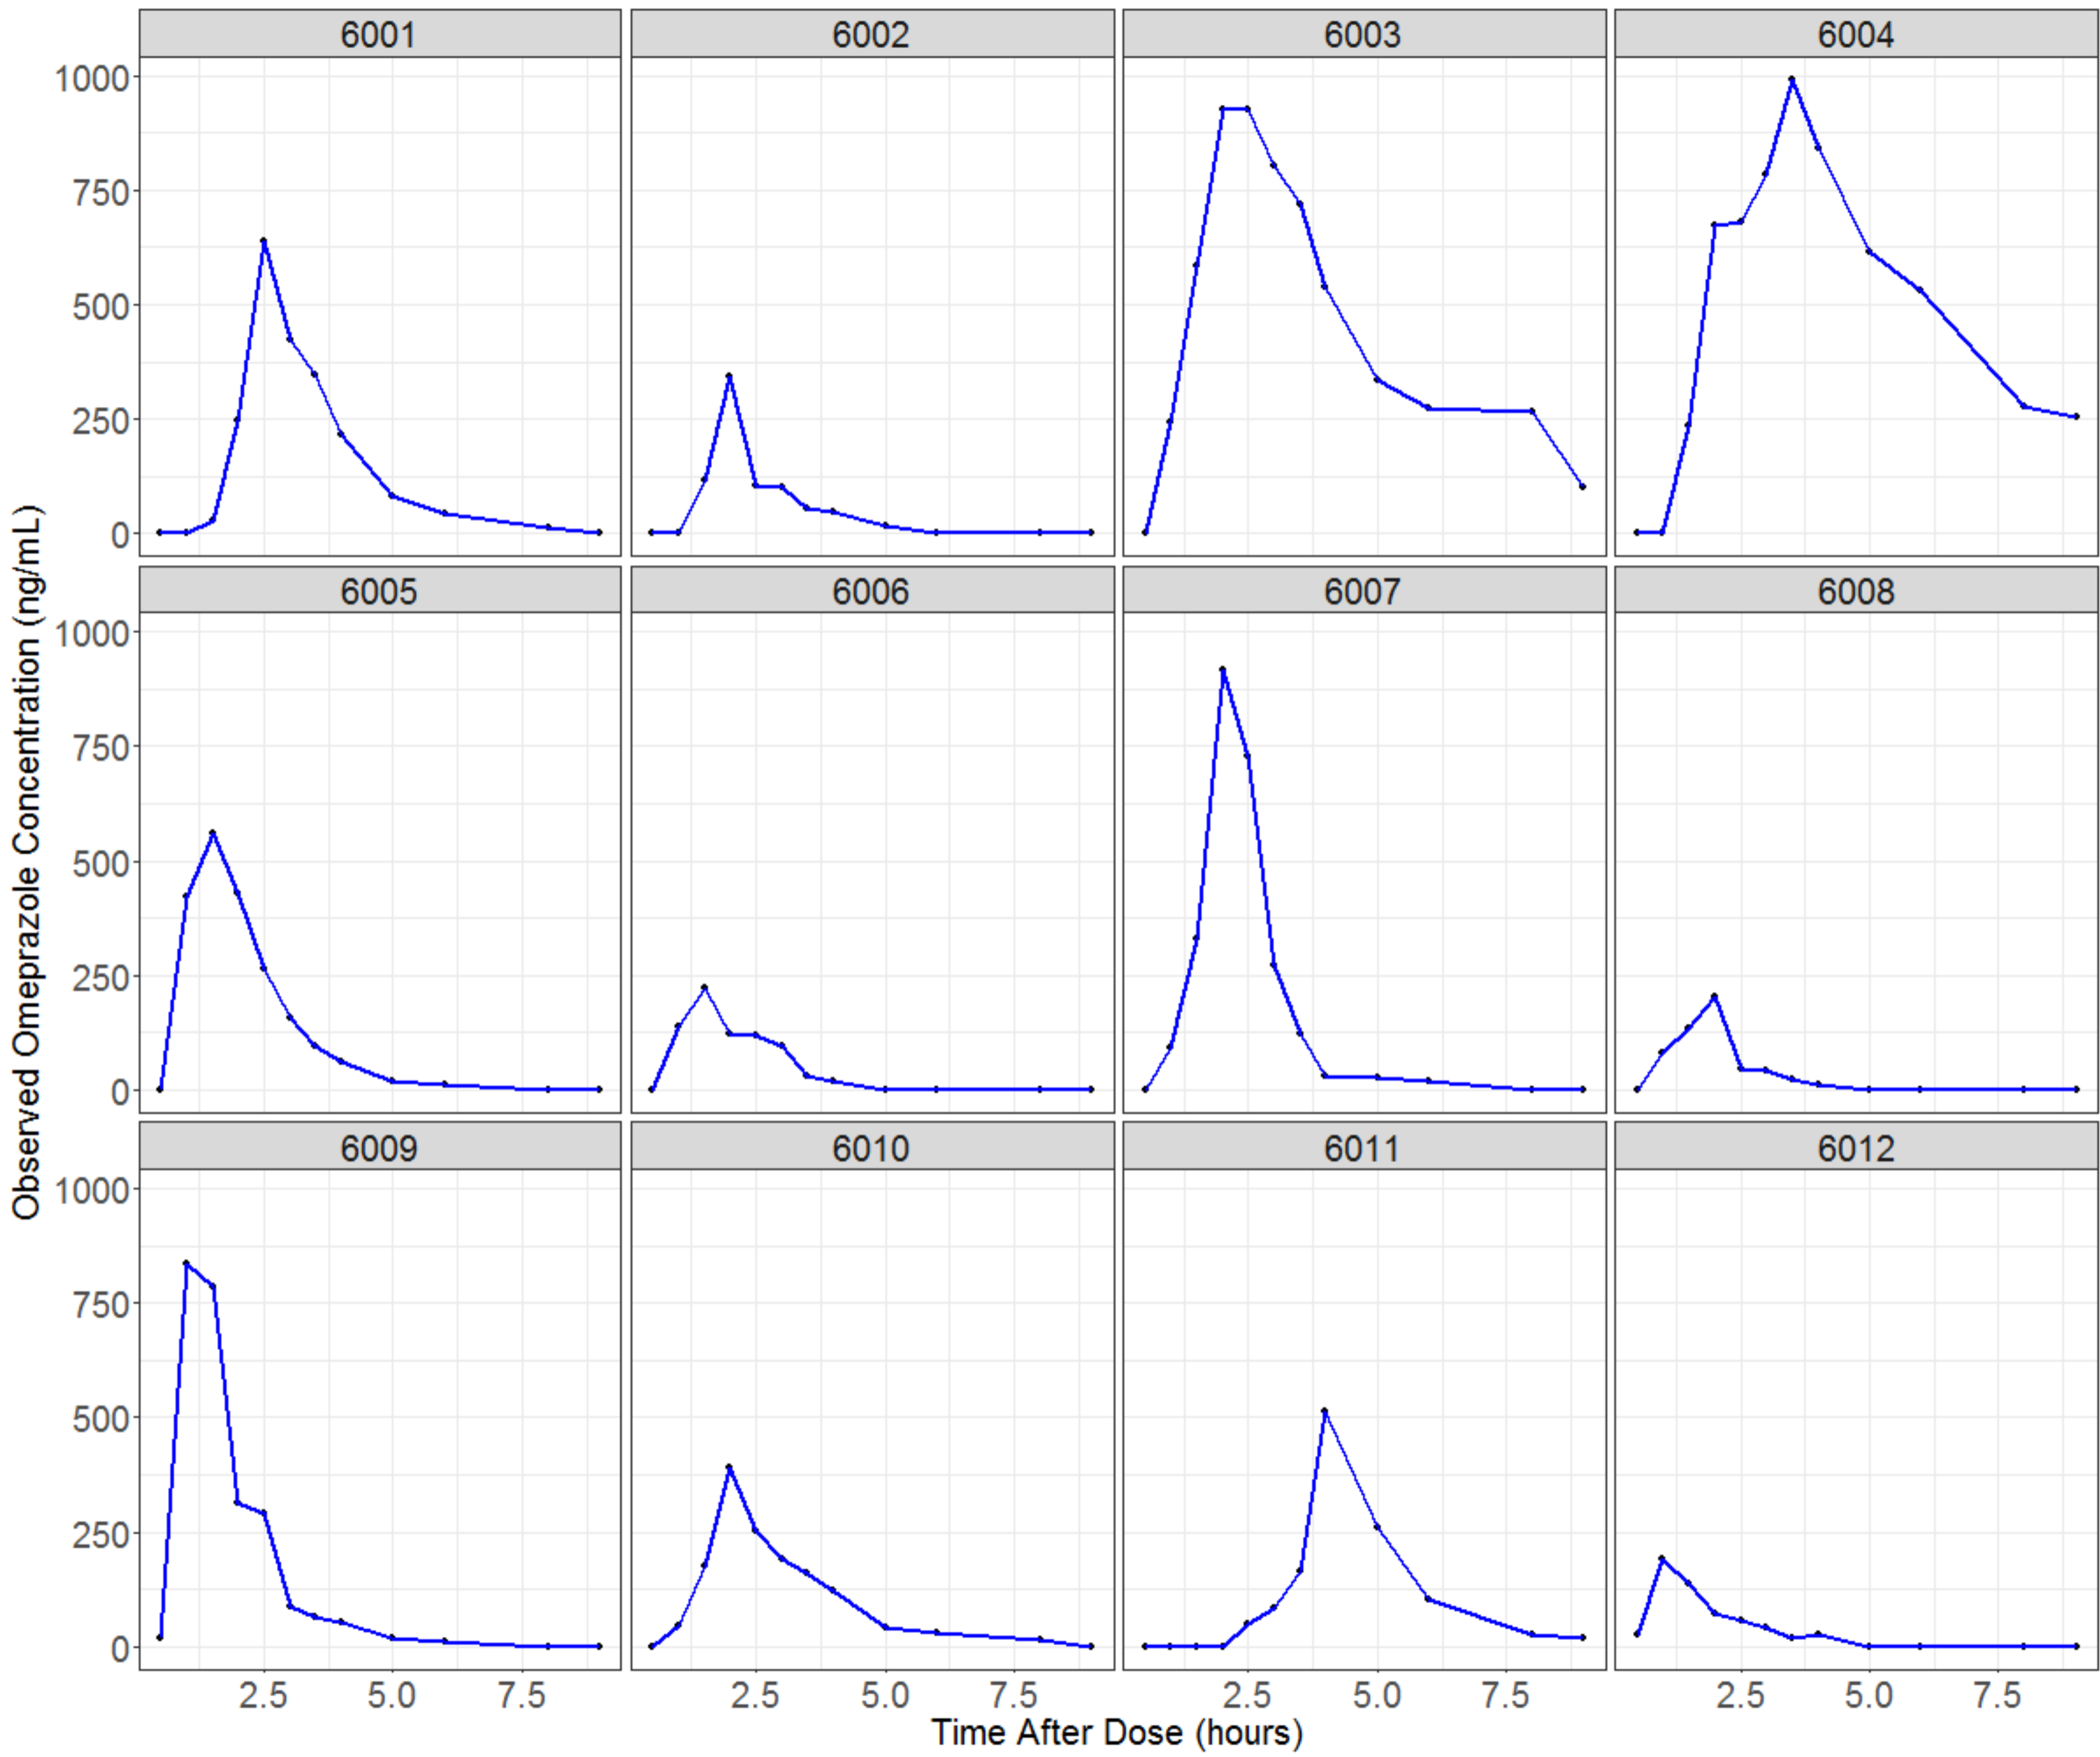

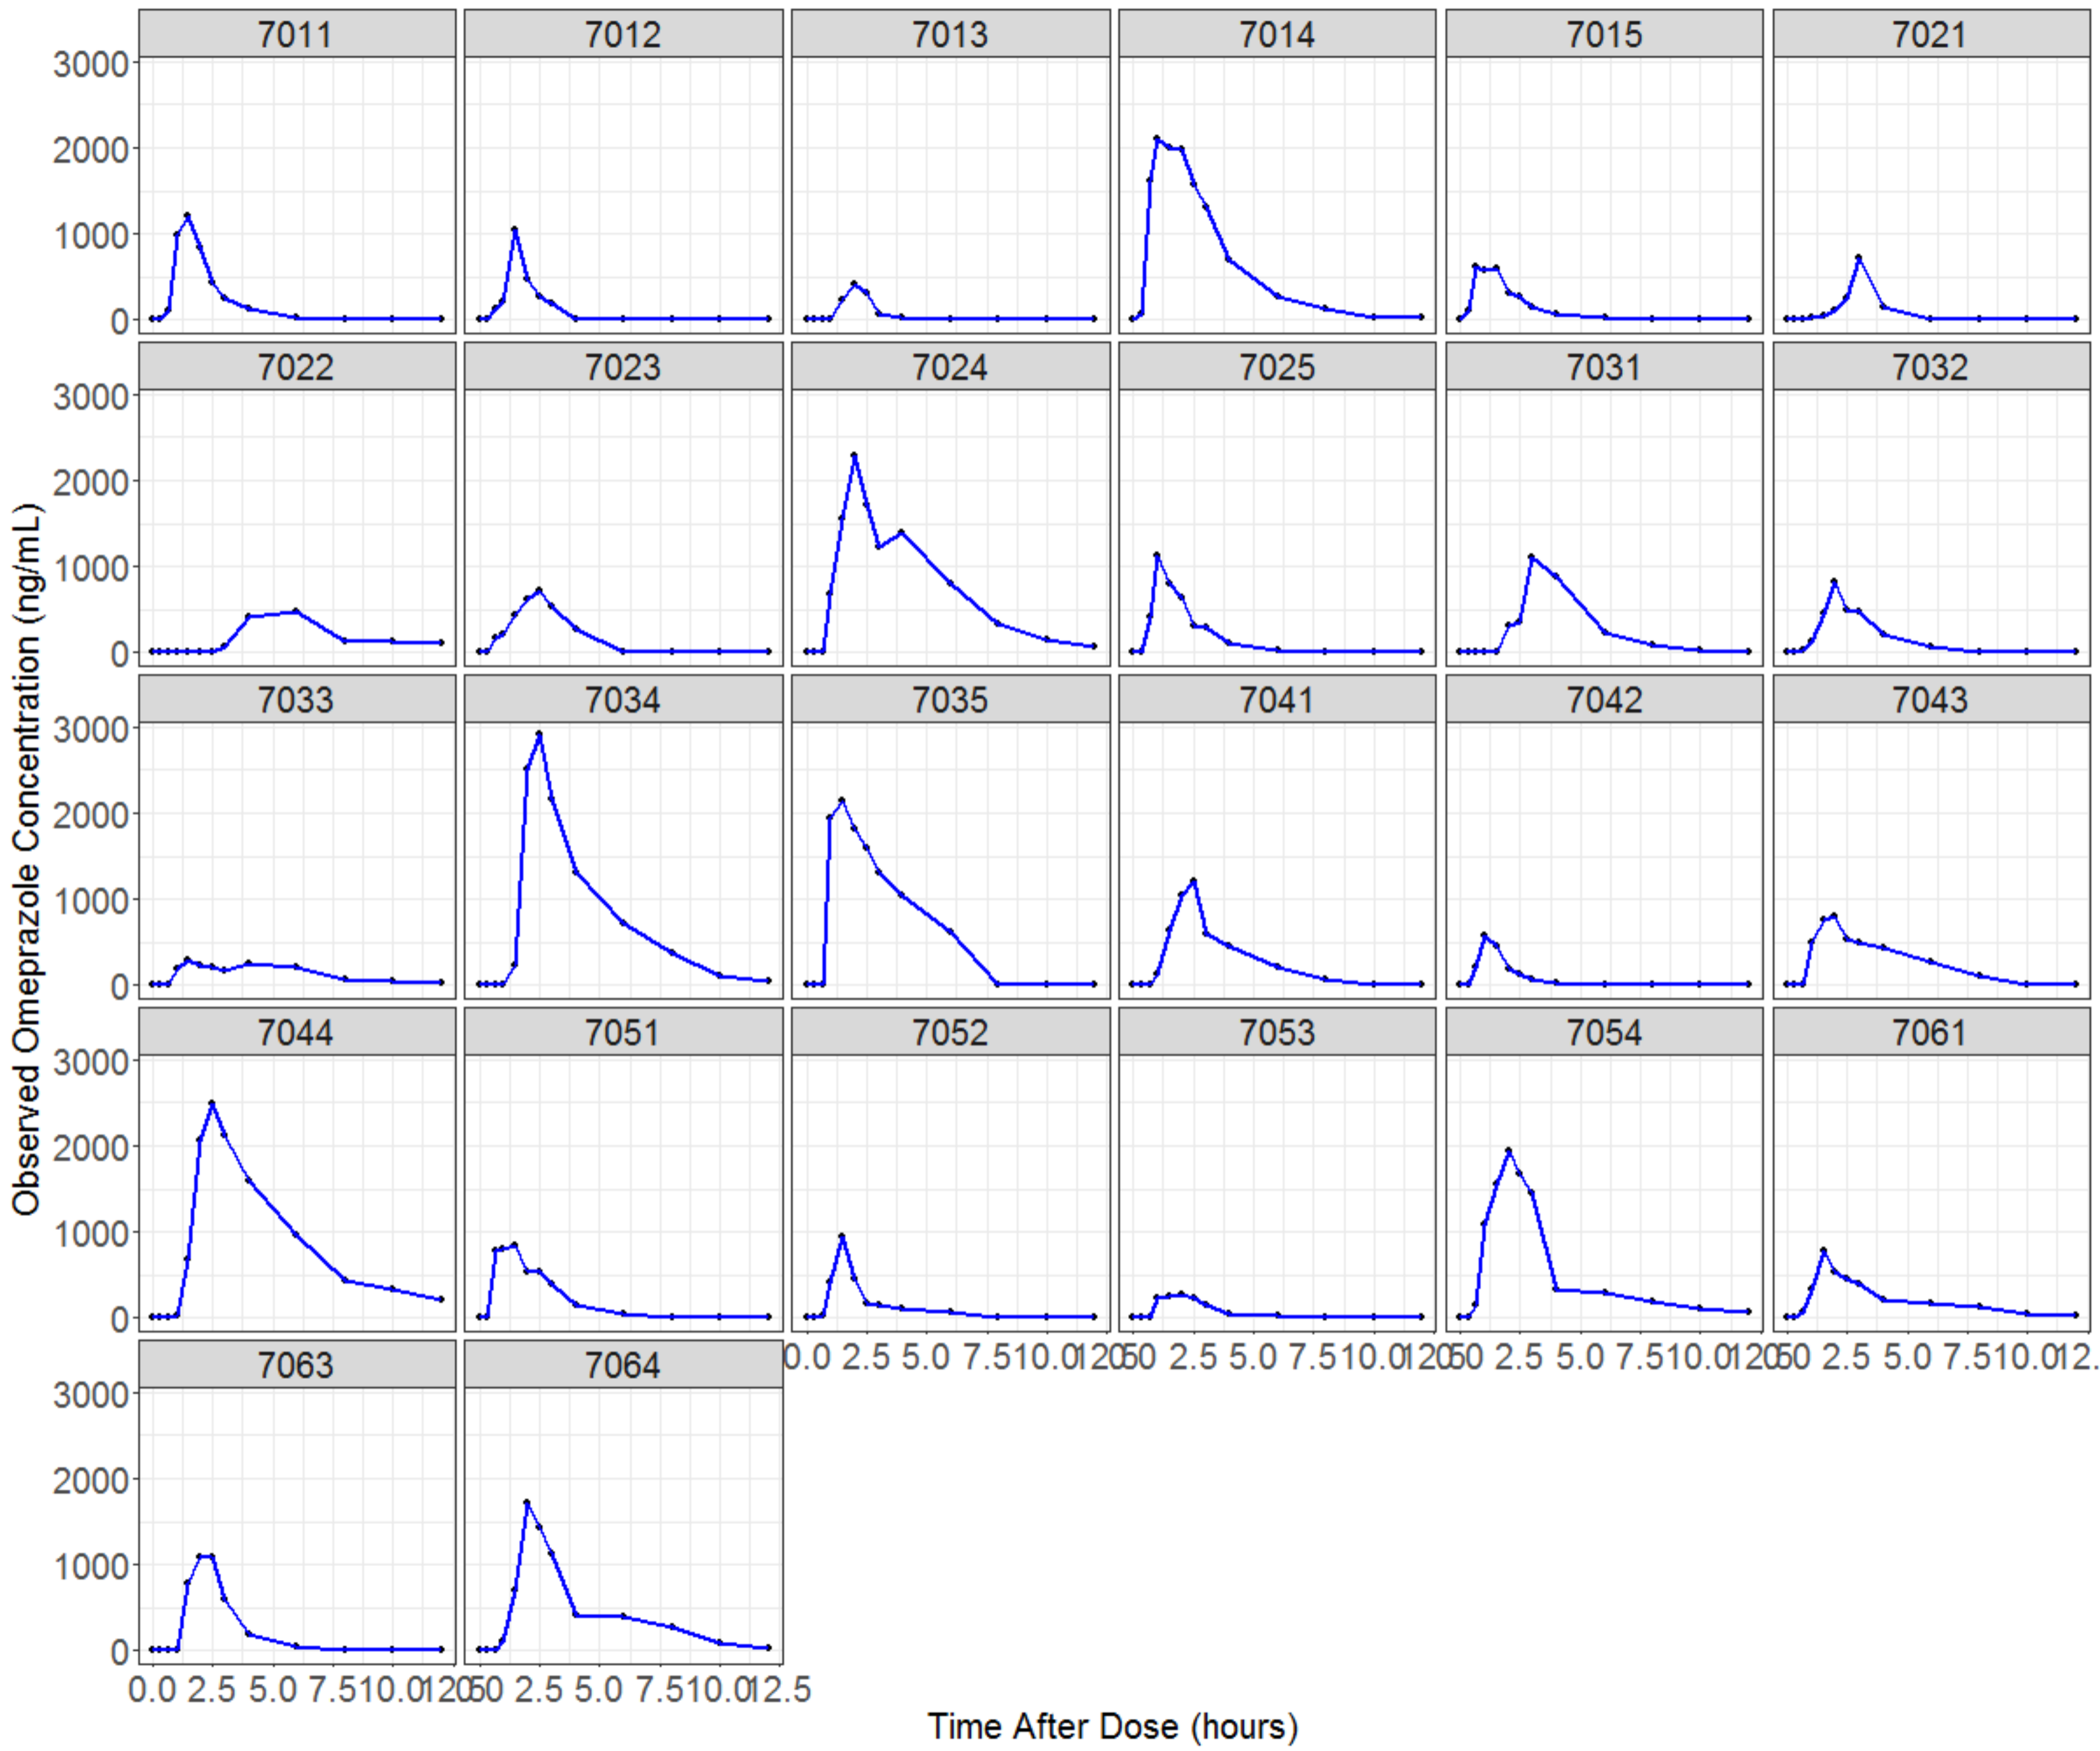

**Figure 2 Supplemental Digital Content.** (See Figure Legend for additional details)

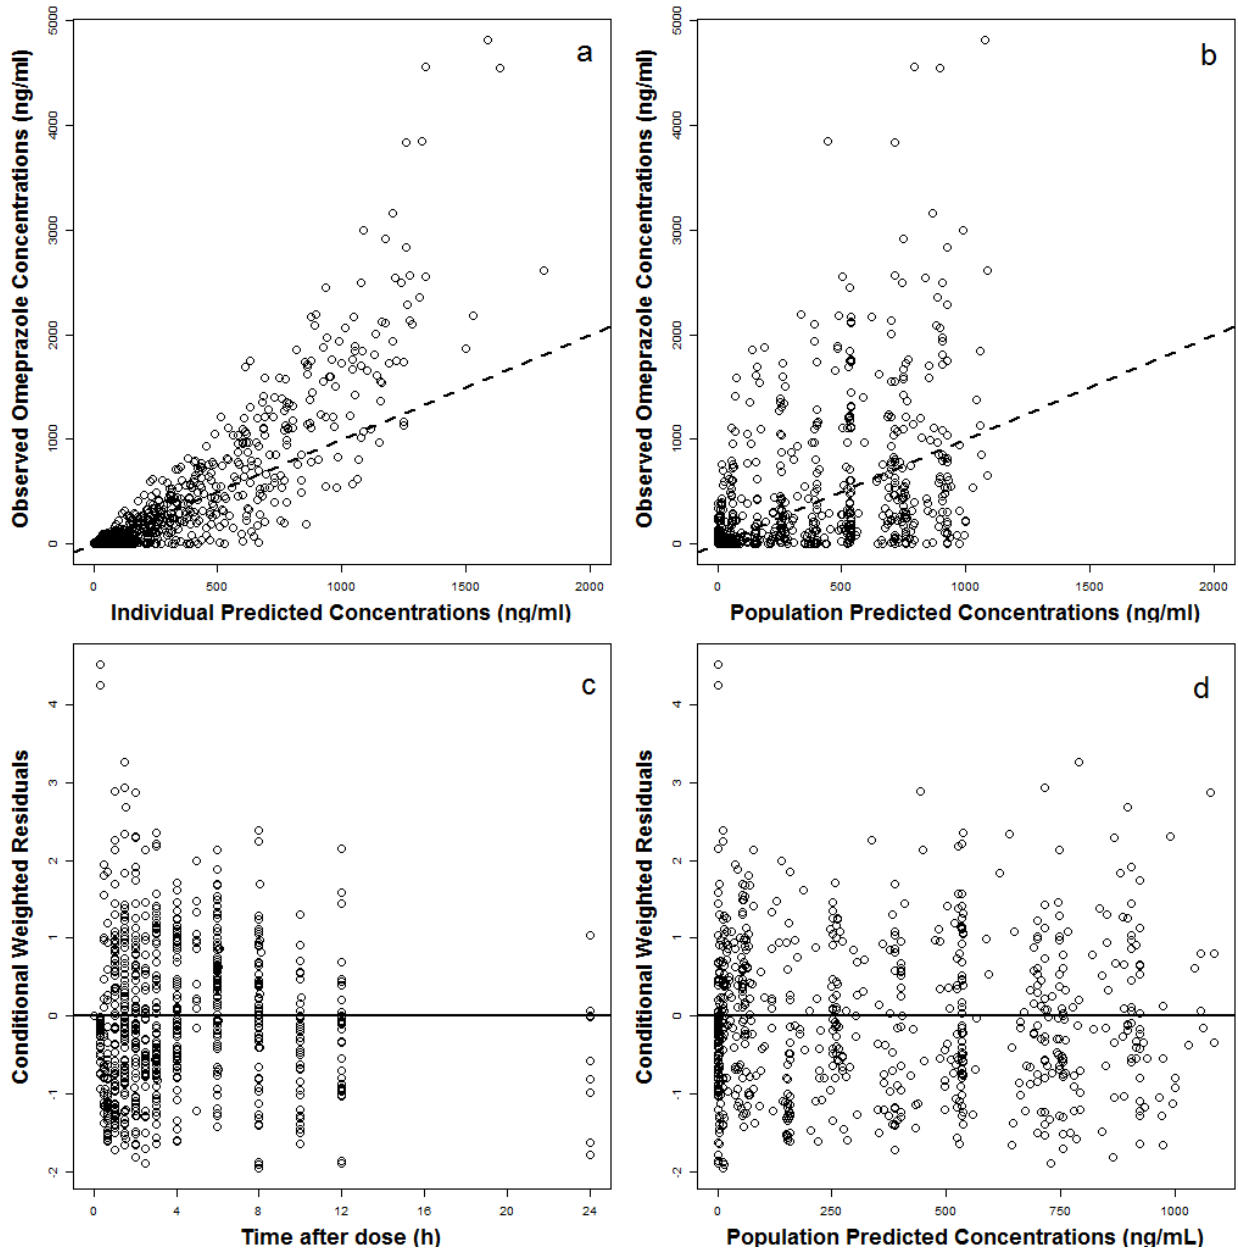

## **SUPPLEMENTAL DIGITAL CONTENT, FIGURE LEGENDS**

Figure 1. Individual plasma concentration time profiles from each previously published study.

Figure 2. Goodness-of-fit plots for the final model of a. Observed versus individual predicted concentrations; b. observed versus population predicted concentrations; c. conditional weighted residuals (CWRES) versus time after dose; and d. CWRES versus population predicted concentrations. For panels a and b, the dashed line of identity is included as a reference. For panels c and d, a solid line at  $y = 0$  is included as a reference.
